# Supplementary material for: Mitochondria Targeted Antioxidant Significantly Alleviates Preeclampsia Caused by 11β-HSD2 Dysfunction via OPA1 and MtDNA Maintenance
Source: MDPI journal article supplement (doi:10.3390/antiox11081505), 2022-07-31
Supplement: s1 [file s1]

## Online supplement tables and figures

**Table S1. The primers for Q-PCR**

|                        | Forward Primer (5' -> 3') | Reverse Primer (5' -> 3') |
|------------------------|---------------------------|---------------------------|
| $\beta$ -actin (Rat)   | CGTAAAGACCTCTATGCCAACA    | TAGGAGCCAGGGCAGTAATC      |
| 11 $\beta$ -HSD2 (Rat) | GACTAATGTGAACCTCTGGGA     | TCAGTGCTCGGGGTAGAAGGT     |
|                        | G                         | G                         |
| Ndufa1(Rat)            | GGTTGGAGTGTGAGTAACGGT     | TCCAGGCCCTTGGACACATAG     |
| ATP5F1(Rat)            | GTCCCGGGTGGTACTTTCTG      | GGTAAGTGACCTCCAAGGCC      |
| Gstt1(Rat)             | CCAGTCTTTGAAGGGCGTCC      | GGCGCACAGTCGTGTAATG       |
| Mgst2(Rat)             | TTCAATCAAGTTTTTGCAACC     | TCTTGGCAACATGAAAGTCC      |
| Gatm(Rat)              | GCCTCGAGACATCCTGATGG      | GATCACAGGTGTTGGAGGGG      |
| SMS(Rat)               | GGATTGGTATTGCTGGACCT      | CCAAATTAACATCCCCGCTG      |
| TNF- $\alpha$ (Rat)    | TGCCTCAGCCTCTTCTCATT      | TGGTATGAAGTGGCAAATCG      |
| MMP7(Rat)              | GGTGTGGAGTGCCAGATGTT      | ACCATCCGTCCAGTACTCAT      |
| ADAMts5(Rat)           | CCCAAATACGCAGGTGTCCT      | ACACACGGAGTTGCTGTAGG      |
| Sdhb(Rat)              | GGAGGGCAAGCAACAGTATC      | TTGTCTCCGTTCCACCAGTAA     |
| Uqcrc2(Rat)            | TGCAGCCTCAGGAACTTGAG      | ACCGAAACCAACCTGAACCA      |
| Mtco1(Rat)             | CCCACTTTGCCATTATATTGTA    | TTTCATGTGGTGTAAGCATCTGG   |
|                        | GG                        |                           |
| MTERF2(Rat)            | GACCTACGCCGAGGAGATTG      | CGGAGTCTGTGAAGCCTTGT      |
| Ddx3(Rat)              | TTATACACGCCCAACTCC        | GACGCCCATACTTTCCAT        |
| Nsun4(Rat)             | TCGGAGTTATTGGCGTTGCT      | TCCATGCTGCAGACCAAGAG      |
| OPA1(Rat)              | TCACTGCGGGTACACCTGG       | CTGACACCTTCCTATAGTGCTTG   |

|                       |                        |                        |
|-----------------------|------------------------|------------------------|
|                       |                        | T                      |
| MFN1(Rat)             | GCTGCATACAGACAGACAGCC  | GGTAATGACCTGTCTCAGGGCT |
|                       | T                      |                        |
| MFN2(Rat)             | CACTACCACATCGGACACCCTA | GAACTTGTGTCTTGCATTGGC  |
| Drp1(Rat)             | GAAGTGGTGCAGTGGAAATGA  | GTTTCTATTGGGAACCACTGCC |
|                       | C                      |                        |
| Fis1(Rat)             | GCACGCAGTTTGAATACGCC   | GCTGCTCCTCTTTGCTACCTT  |
| Parkin(Rat)           | GAGCTAAACCCACCTACCACAG | CATCCGGTTTGAATTAAGACA  |
| PINK1(Rat)            | TGCAATGCCGCTGTGTATGA   | TCTGCTCCCTTTGAGACGAC   |
| RPS18(Rat)            | TCTTCCACAGGAGGCCTACA   | ACAGCAAAGGCCCAAAGACT   |
| 16SrRNA(Rat)          | GGTGCAGCCGCTATTAAAGG   | ATCATTTACGGGGGAAGGCG   |
| $\beta$ -actin(Human) | GGCACCCAGCACAATGAAG    | CCGATCCACACGGAGTACTTG  |
| B2M(Human)            | TGTTCTGCTGGGTAGCTCT    | CCTCCATGATGCTGCTTACA   |
| 16SrRNA(Human)        | GGTGCAGCCGCTATTAAAGG   | ATCATTTACGGGGGAAGGCG   |
| MTERF2(Human)         | GAGGATGAAACCTATGTTGAA  | ACAGACATTGCTTCCGGGCAGC |
|                       | G                      |                        |
| OPA1(Human)           | GGCTCTGCAGGCTCGTCTCAA  | TTCCGCCAGTTGAACGCGTTTA |
|                       | GG                     | CC                     |

**Table S2.** Antibodies for western blotting and immunofluorescence

| Antibody         | Manufactory | Catalog Number | Host / Isotype |
|------------------|-------------|----------------|----------------|
| 11 $\beta$ -HSD2 | Proteintech | 14192-1-AP     | Rabbit / IgG   |
| ATP5F1           | Proteintech | 15999-1-AP     | Rabbit / IgG   |

|                |             |            |              |
|----------------|-------------|------------|--------------|
| CD31           | abcam       | ab222783   | Rabbit / IgG |
| LC3            | Proteintech | 14600-1-AP | Rabbit / IgG |
| Mtco1          | Immunoway   | YN0177     | Rabbit / IgG |
| MTERF2         | Immunoway   | YT6815     | Rabbit / IgG |
| Ndufa1         | Boster      | BA3676     | Rabbit / IgG |
| OPA1           | abcam       | ab42364    | Rabbit / IgG |
| Parkin         | Proteintech | 14060-1-AP | Rabbit / IgG |
| Sdhb           | Proteintech | 10620-1-AP | Rabbit / IgG |
| Uqcrc2         | Proteintech | 14742-1-AP | Rabbit / IgG |
| $\beta$ -actin | Proteintech | 20536-1-AP | Rabbit / IgG |

**Table S3.** Clinical characteristics of the pregnant woman enrolled in this study

|                                | Normotension<br>(n=24) | PE<br>(n=24)      | P value |
|--------------------------------|------------------------|-------------------|---------|
| Maternal age (years)           | 32.25 $\pm$ 4.376      | 33.29 $\pm$ 4.309 | 0.4103  |
| BMI (kg/m <sup>2</sup> )       | 25.96 $\pm$ 3.219      | 30.05 $\pm$ 4.352 | 0.0006  |
| Gestational age (wk)           | 39.49 $\pm$ 0.6810     | 37.39 $\pm$ 1.363 | <0.0001 |
| Systolic blood pressure (mmHg) | 112.8 $\pm$ 13.24      | 153.5 $\pm$ 13.33 | <0.0001 |
| Proteinuria (g/24h)            | NA                     | 3.197 $\pm$ 2.713 | NA      |
| Infant birth weight (g)        | 3286 $\pm$ 261.3       | 2510 $\pm$ 608.1  | <0.0001 |

Statistical analysis was performed by two-tailed Student's t test.

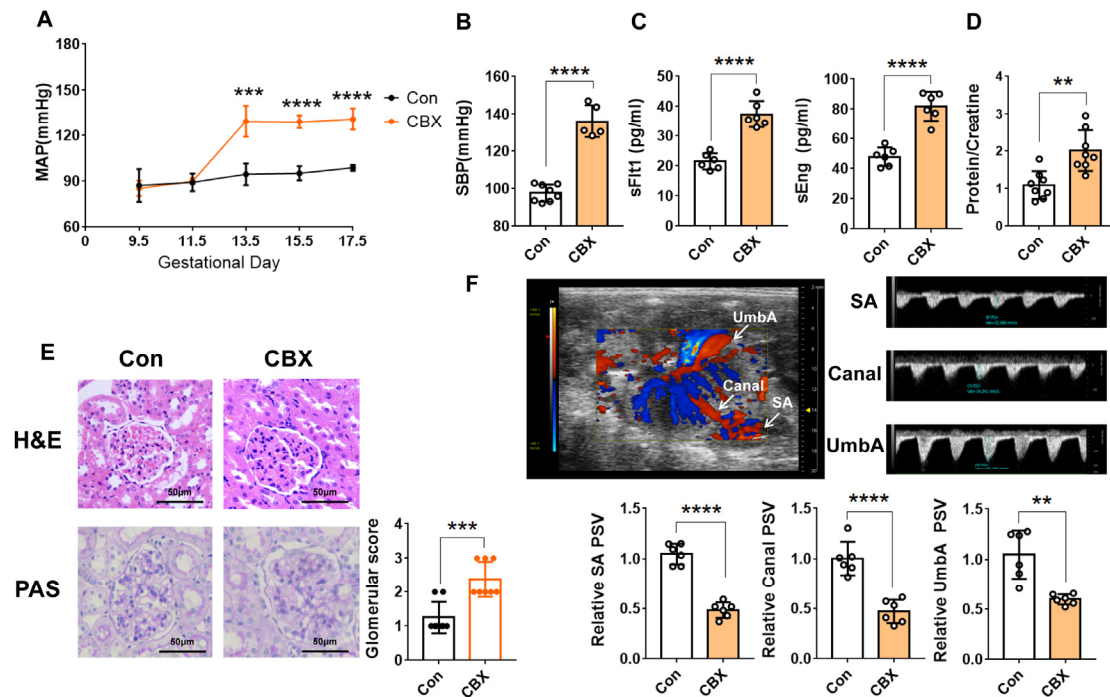

**Figure S1. 11 $\beta$ -HSD2 inhibition leads to PE-like features in pregnant rats.**

Pregnant rats were administrated with 11 $\beta$ -HSD2 inhibitor CBX (2.4mg/kg) or saline from GD7.5 to GD17.5. Urine was collected from GD18.5 to GD19.5. After determination of arterial BP, the rats were sacrificed on GD20.5 for collection of blood and tissues. **A**, MAP measured from GD 9.5 until GD 17.5. **B**, SBP measured on GD20.5. **C**, the circulatory sFlt1 and sEng levels in the rat model. **D**, protein/creatinine (mg/mg) in urine in the rat model. **E**, morphology of glomeruli stained by H&E and PAS. Left panel: the representative images (400 $\times$ ). Right panel: histopathological score of glomerular pathology. **F**, doppler ultrasonography. Upper panel: the representative images of SA in implantation sites, canal in placentas and fetal UmbA visualized by ultrasound biomicroscopy. Lower panel: cumulative data of the PSV of SA, Canal and UmbA. \* $p < 0.05$ , \*\* $p < 0.01$ , \*\*\* $p < 0.001$ , \*\*\*\* $p < 0.0001$ . Con: control.

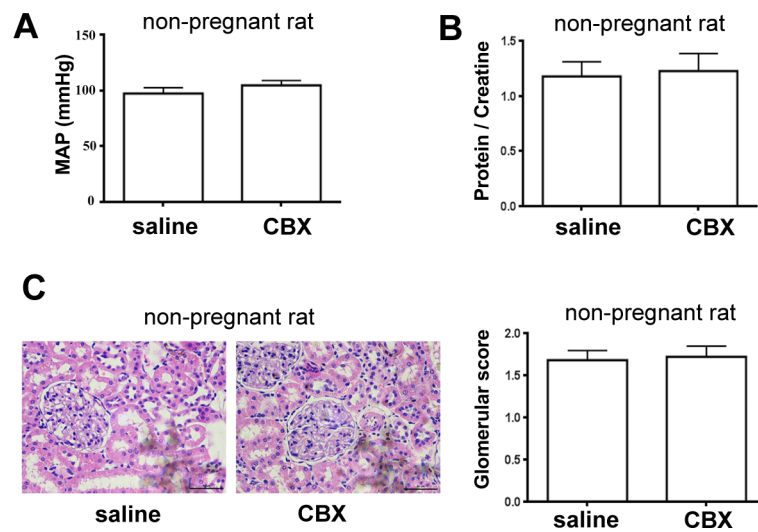

**Figure S2. The effects of CBX on blood pressure and renal morphology in nonpregnant rats.** Nonpregnant female rats were randomly divided into two groups saline or CBX (n=5 in each group). The rats were injected saline or CBX at 2.4mg/kg once a day for 10 days. Rats of saline group received same volume of saline. **A**, MAP. **B**, protein/creatinine (mg/mg) in urine. **C**, morphology of glomeruli stained by H&E. Left panel: the representative images (400×). Right panel: histopathological score of glomerular pathology.

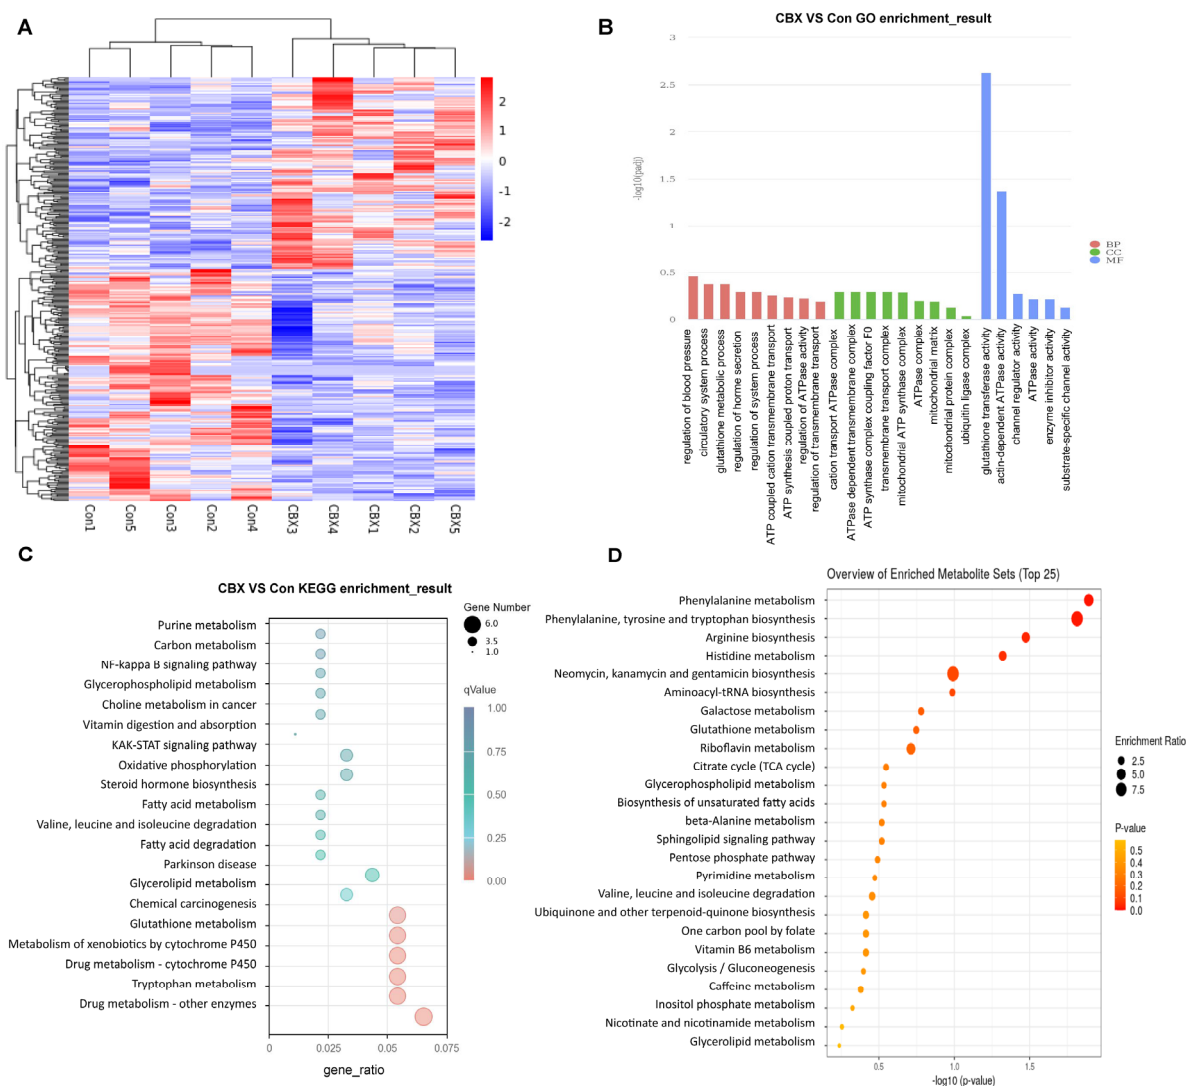

**Figure S3. Heatmap and pathway enrichment of transcriptomics and metabolomics of the placentas in rat PE-like model.** Pregnant rats were administrated with CBX (2.4mg/kg) or saline from GD7.5 to GD17.5. The placentas were collected on GD20.5 for RNA-seq and untargeted metabolomics. **A**, the differential genes analyzed by RNA-seq. Left panel: heat map of the differential genes (CBX VS Con: P value<0.05, Fold Change>1.5). Right panel: statistical map of up and down regulated differential genes. **B**, GO enrichment analysis in transcriptomics. **C**, KEGG enrichment analysis in transcriptomics. **D**, KEGG enrichment analysis in metabolomics.

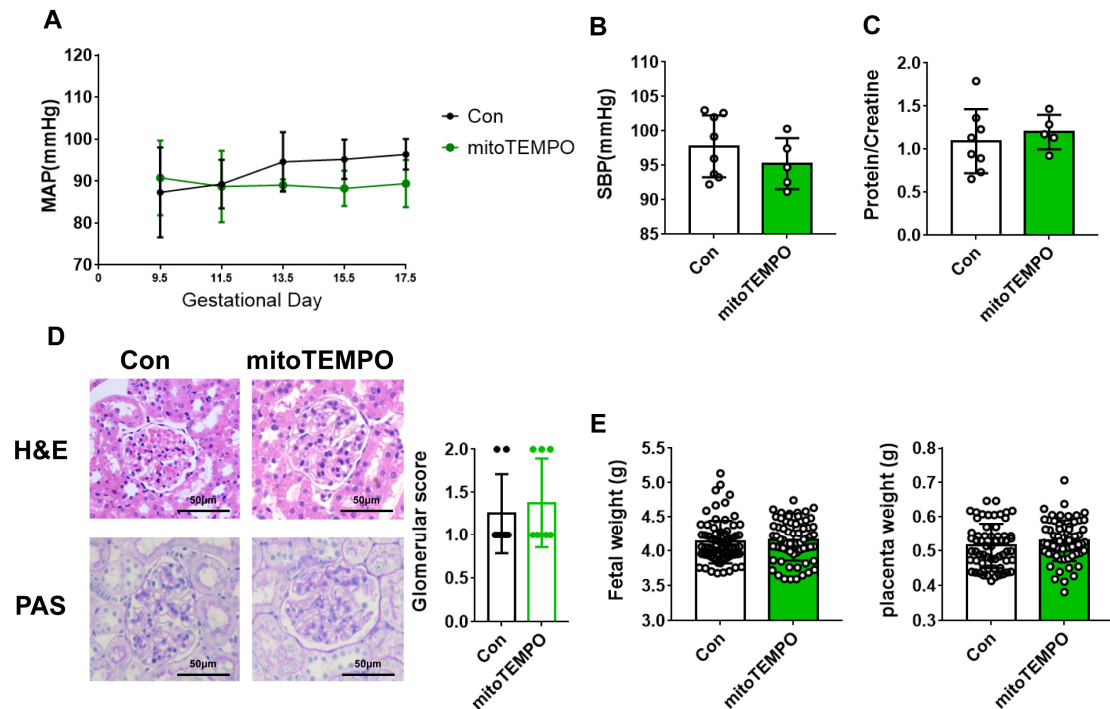

**Figure S4. The effects of MitoTEMPO alone on blood pressure, renal morphology, and fetal and placental weight in pregnant rats.** Pregnant rats were administrated with mitoTEMPO (1mg/kg) from GD7.5 to GD17.5. Urine was collected from GD18.5 to GD19.5. After determination of arterial BP, the rats were sacrificed on GD20.5 for collection of blood and tissues. **A**, MAP measured from GD 9.5 until GD 17.5. **B**, SBP measured on GD20.5. **C**, protein/creatinine (mg/mg) in urine in the rat model. **D**, morphology of glomeruli stained by H&E and PAS. Left panel: the representative images (400×). Right panel: histopathological score of glomerular pathology. **E**, fetal and placental weight from 8 dams (each group) measured on GD 20.5. \* $p < 0.05$ , \*\* $p < 0.01$ , \*\*\* $p < 0.001$ , \*\*\*\* $p < 0.0001$ . Con: control.

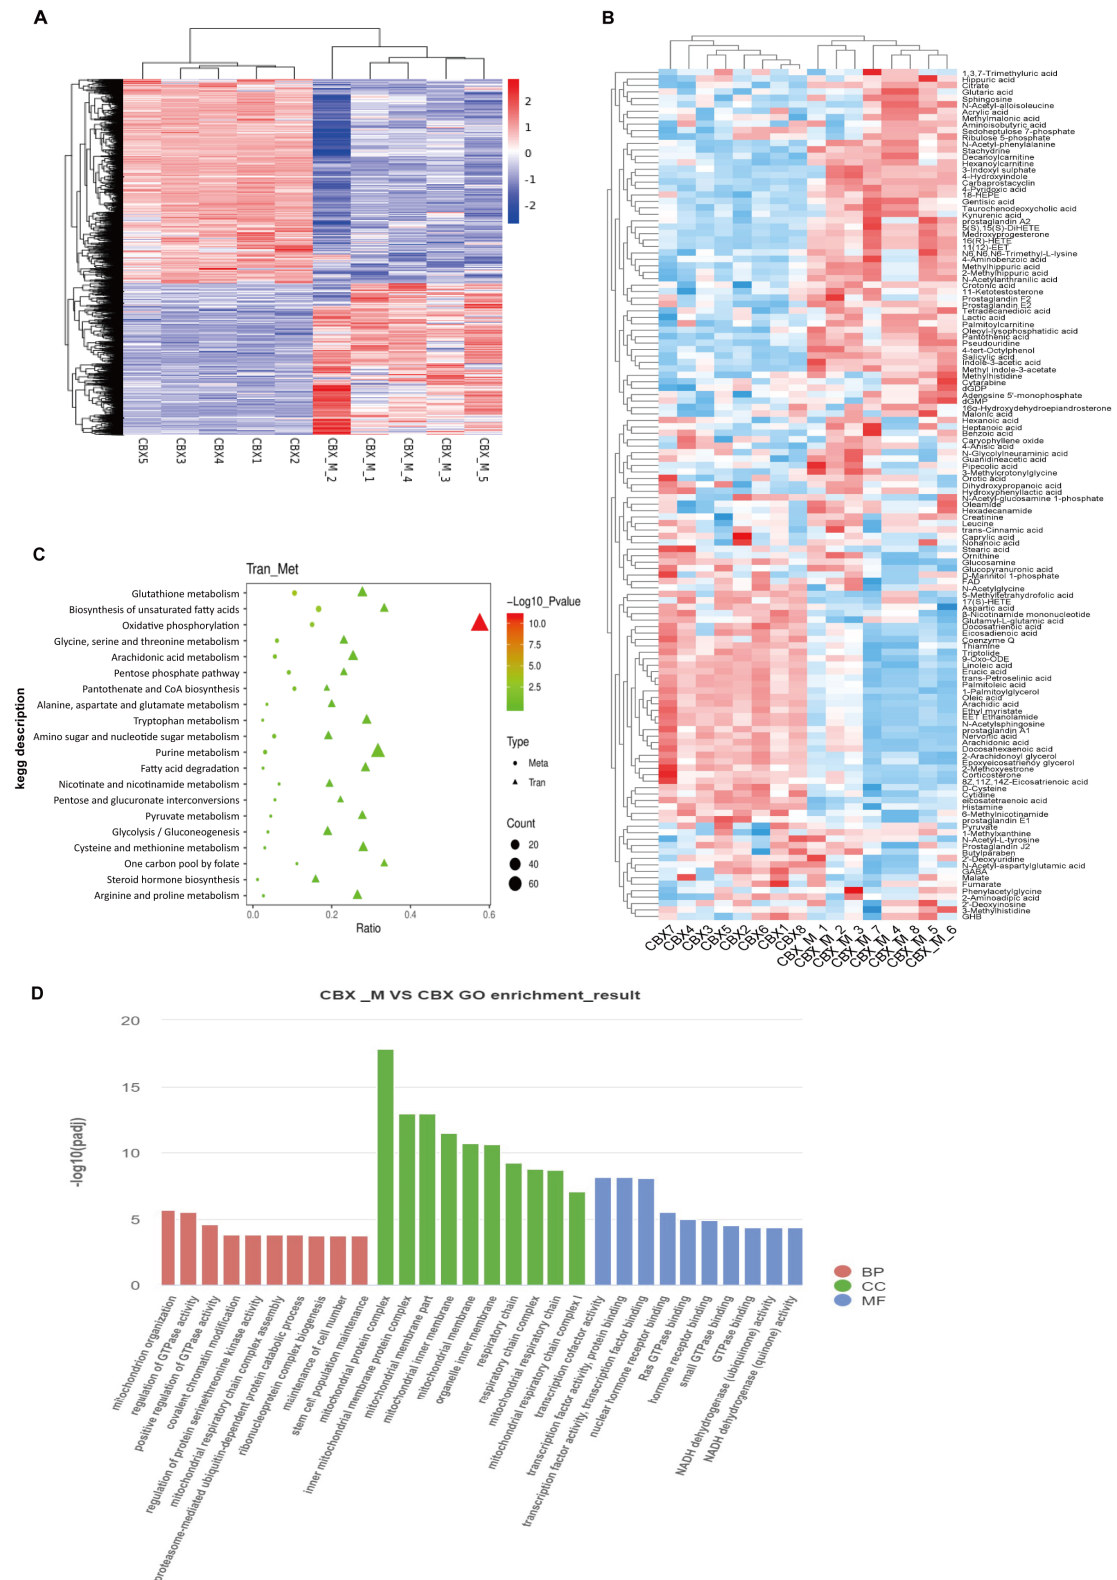

**Figure S5. Transcriptomics and metabolomics of the placentas in the PE-like model with mitoTEMPO treatment.** Pregnant rats were administrated with CBX (2.4mg/kg) and CBX combined with mitoTEMPO (1mg/kg) from GD7.5 to GD17.5.



The placentas were collected on GD20.5 for RNA-seq and untargeted metabolomics.

**A**, Cluster heat map of the differential genes (CBX\_M VS CBX: P value<0.05, Fold Change>1.5 ). Rows are CBX and CBX\_M arms and columns are differential genes, respectively. **B**, Cluster heat map of the differential metabolites (CBX\_M VS CBX: VIP>1, P value<0.05, Fold Change>1.5). Rows are CBX and CBX\_M arms and columns are differential metabolites, respectively. **C**, KEGG enrichment analysis combined transcriptomics with metabolomics. **D**, GO enrichment analysis in transcriptomics. CBX\_M: CBX combined with mitoTEMPO treatment; Tran: transcriptomics; Met: metabolomics

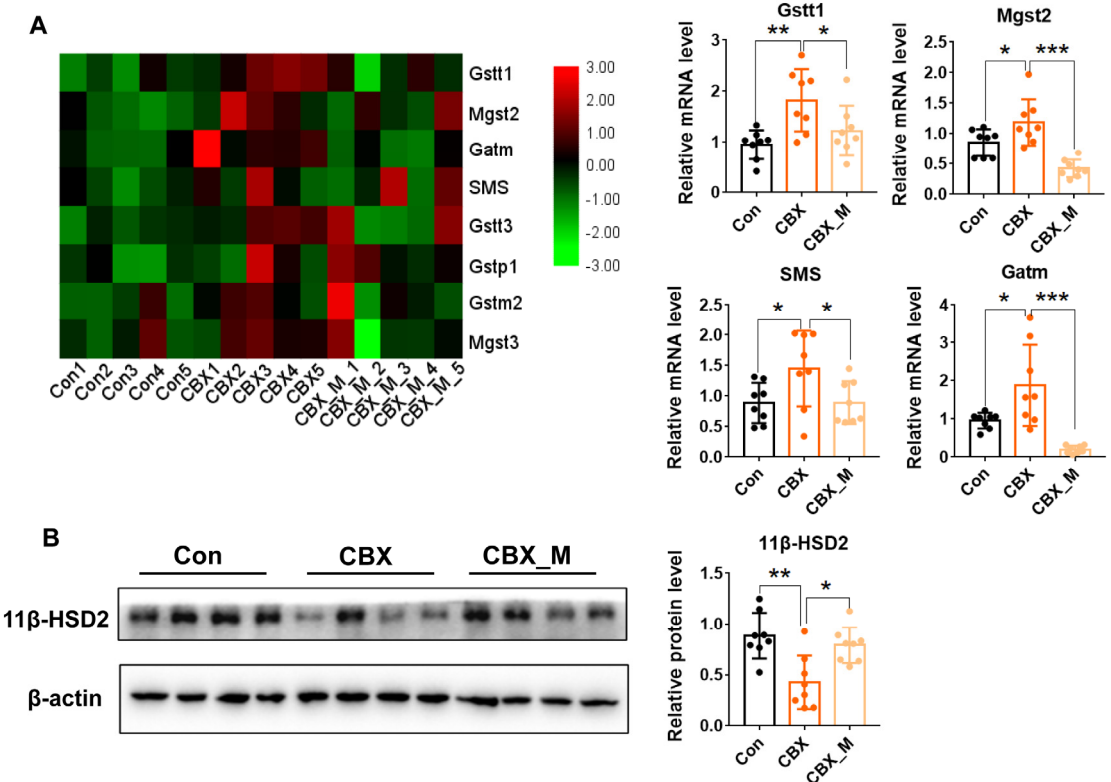

**Figure S6. The expression level of the genes in glutathione metabolism pathway and 11β-HSD2 expression in the PE-like model with mitoTEMPO treatment.**

Pregnant rats were administrated with CBX (2.4mg/kg), CBX combined with mitoTEMPO(1mg/kg) or saline from GD7.5 to GD17.5. The rats were sacrificed on GD20.5 for collection of blood and placental tissues. **A**, the transcriptional levels of the genes that related to glutathione metabolism. Left panel: heatmap of the genes related to glutathione metabolism in RNA-seq. Right panel: cumulative data of Q-PCR analysis. **B**, 11 $\beta$ -HSD2 protein expression level. Left panel: representative images of western blotting. Right panel: cumulative data of each protein expression level. \* $p < 0.05$ , \*\* $p < 0.01$ , \*\*\* $p < 0.001$ , \*\*\*\* $p < 0.0001$ . Con: control; CBX\_M: CBX combined with mitoTEMPO treatment.
